# Supplementary material for: Flipped or traditional online teaching? Two different strategies to handle teaching in nursing education during the COVID-19 pandemic
Source: publisher site journal article supplement (doi:10.1515/ijnes-2021-0119), 2022-01-01
Supplement: Supplementary file 1 [file j_ijnes-2021-0119_suppl.docx]

**Appendix 1A**

Questionnaire (translated from Swedish)

1. Did you attend in any of the group discussions, the whole-class seminars and

the lectures via Zoom?

|  | Immunology | Asthma & allergy | Microbiology |
| --- | --- | --- | --- |
| Yes. At  the group discussions. |  |  |  |
| Yes. At  the whole class seminars. |  |  |  |
| Yes. At the lectures |  |  |  |
| No. I worked. |  |  |  |
| No. I do not like  group discussions. |  |  |  |
| No. I thought the films were enough. |  |  |  |
| No. If other  reason, enter below. |  |  |  |

Comments:

2. Did you watch the recorded lectures before the meetings in zoom?

|  | Immunology | Asthma & allergy |
| --- | --- | --- |
| I had seen all the recordings several times. |  |  |
| I had seen all the recordings once. |  |  |
| I had seen some recordings several times. |  |  |
| I had seen some recordings once. |  |  |
| I had not seen  Any recording. |  |  |

Comments:

3. In addition to watching the recorded lectures, how prepared were you before the meeting in Zoom?

|  | Immunology | Asthma & allergy |
| --- | --- | --- |
| Very well prepared. |  |  |
| Somewhat prepared. |  |  |
| Not at all prepared. |  |  |

Comments:

4. How did you experience the discussions in smaller groups? Select several options if you want.

|  | Immunology | Asthma & allergy |
| --- | --- | --- |
| They were rewarding. |  |  |
| It was a good atmosphere in the group. |  |  |
| I dared to speak. |  |  |
| They were not that rewarding. |  |  |
| It was an unpleasant atmosphere in the group. |  |  |
| I did not dare to speak. |  |  |

Comments:

5. How did you experience working with the subject in this way (group discussions & whole class discussion) compared to lectures in Zoom? Select several options if you want.

- Great. You learn from reasoning with a fellow student.
- It was really good to be able to prepare myself with pre-recorded lectures so that questions have time to arise before you meet the teacher.
- It was pretty good, but also a somewhat hard to have to be active in a group.
- Not so good. I think it is better with a lecture where you can ask your questions at the time.
- Not so good. I do not like to work in groups.

Comments:

6. Do you think that you succeeded better or worse through the teaching approach with recorded lectures, group and whole class discussions compared to participating in regular lectures?

- I performed much better.
- I performed somewhat better
- There was no difference
- I did slightly worse
- I did much worse

Comments:

7. Do you think that you needed to spend more or less time on the subjects that had the design with films, group and whole class discussions, compared to traditional lectures?

- Much more time
- Slightly more time
- No difference in time
- Slightly less time
- Much less time

Comments:

8. How confident did you feel in the subject areas before the exam?

|  | Immunology | Asthma & allergy | Microbiology |
| --- | --- | --- | --- |
| I felt very confident |  |  |  |
| I felt pretty confident |  |  |  |
| I felt pretty insecure |  |  |  |
| I felt very insecure |  |  |  |

Comments:

9. Did you use the quiz regarding the immune system, asthma & allergies?

- Yes, I did them over and over again in quick succession until I got almost everyone right
- Yes I did them a few times to see if I knew what I was studying.
- Yes, I did them on some occasion to see if I knew what I was studying.
- Yes, I did them on some occasion, but they did not give much.
- No, I did not do them because I would just be stressed by knowing everything I did not know.
- No, I did not have time for that.

Comments:

10. Which form of teaching do you prefer?

- Flipped, where I watch films before I meet the teacher for guidance via Zoom.
- Flipped where I watch films before they are followed up with group seminars and supervision with the teacher via Zoom.
- Lectures via Zoom.

Comments:
